# Supplementary material for: Population Dynamics Among six Major Groups of the Oryza rufipogon Species Complex, Wild Relative of Cultivated Asian Rice
Source: Rice (N Y). 2016 Oct 12;9:56. doi: 10.1186/s12284-016-0119-0 (PMC5059230; doi:10.1186/s12284-016-0119-0)
Supplement: Supplementary file 15 — Numeric LD Decay. (XLSX 14 kb) [file 12284_2016_119_MOESM15_ESM.xlsx]

## Sheet: Sheet3
Table S7. Numeric LD Decay. LD decay by distance between pairs of SNPs. Mean values were calculated for all between-SNP distances that fell within a distance range centering on the values listed first column. All populations except W5 were subsampled 100 times to 12 individuals (the sample size of the W5 population). The values in parentheses are 95% confidence intervals calculated from these sub…
Distance, kb	W1	W2	W3	W4	W5	W6
0.5	1 (1, 1)	1 (1, 1)	1 (1, 1)	1 (1, 1)	1	1 (1, 1)
1.5	0.533 (0.344, 0.615)	0.625 (0.563, 0.891)	0.862 (0.635, 0.952)	0.571 (0.503, 0.77)	1	0.571 (0.503, 0.643)
2.5	0.438 (0.326, 0.558)	0.556 (0.429, 0.651)	0.865 (0.643, 1)	0.523 (0.4, 0.596)	1	0.556 (0.385, 0.625)
6	0.369 (0.283, 0.463)	0.45 (0.36, 0.6)	0.803 (0.641, 0.89)	0.444 (0.382, 0.583)	1	0.438 (0.4, 0.54)
12	0.25 (0.2, 0.336)	0.4 (0.333, 0.567)	0.64 (0.556, 0.86)	0.376 (0.321, 0.517)	0.898	0.36 (0.311, 0.429)
18	0.229 (0.166, 0.297)	0.357 (0.286, 0.464)	0.6 (0.541, 0.858)	0.342 (0.28, 0.45)	0.894	0.308 (0.25, 0.36)
24	0.2 (0.151, 0.259)	0.333 (0.25, 0.429)	0.533 (0.425, 0.613)	0.333 (0.25, 0.415)	0.758	0.3 (0.243, 0.365)
30	0.2 (0.143, 0.248)	0.333 (0.25, 0.429)	0.513 (0.429, 0.601)	0.321 (0.25, 0.4)	0.667	0.256 (0.223, 0.337)
36	0.177 (0.128, 0.229)	0.3 (0.238, 0.412)	0.445 (0.372, 0.561)	0.286 (0.233, 0.372)	0.625	0.25 (0.213, 0.319)
42	0.174 (0.124, 0.226)	0.276 (0.229, 0.368)	0.425 (0.338, 0.531)	0.286 (0.229, 0.364)	0.598	0.25 (0.205, 0.301)
48	0.177 (0.119, 0.229)	0.262 (0.229, 0.375)	0.417 (0.349, 0.54)	0.25 (0.226, 0.359)	0.562	0.238 (0.2, 0.3)
54	0.167 (0.125, 0.222)	0.267 (0.22, 0.375)	0.359 (0.298, 0.466)	0.25 (0.229, 0.357)	0.583	0.229 (0.2, 0.301)
60	0.16 (0.115, 0.212)	0.267 (0.225, 0.375)	0.32 (0.244, 0.417)	0.25 (0.215, 0.346)	0.527	0.226 (0.177, 0.294)
66	0.161 (0.123, 0.222)	0.25 (0.214, 0.357)	0.357 (0.268, 0.505)	0.25 (0.209, 0.333)	0.462	0.229 (0.198, 0.284)
72	0.16 (0.115, 0.21)	0.25 (0.2, 0.357)	0.329 (0.243, 0.504)	0.238 (0.2, 0.316)	0.438	0.229 (0.191, 0.286)
78	0.149 (0.111, 0.217)	0.25 (0.2, 0.323)	0.266 (0.205, 0.393)	0.25 (0.207, 0.325)	0.438	0.222 (0.18, 0.255)
84	0.151 (0.111, 0.203)	0.248 (0.2, 0.33)	0.283 (0.206, 0.375)	0.238 (0.2, 0.313)	0.423	0.208 (0.17, 0.25)
90	0.143 (0.111, 0.211)	0.238 (0.2, 0.327)	0.225 (0.162, 0.32)	0.232 (0.2, 0.307)	0.4	0.206 (0.167, 0.25)
96	0.143 (0.111, 0.201)	0.229 (0.183, 0.308)	0.238 (0.173, 0.357)	0.229 (0.2, 0.312)	0.4	0.201 (0.162, 0.25)
102	0.143 (0.111, 0.198)	0.229 (0.185, 0.307)	0.222 (0.177, 0.299)	0.229 (0.2, 0.3)	0.302	0.2 (0.165, 0.25)
108	0.143 (0.111, 0.2)	0.229 (0.184, 0.308)	0.2 (0.147, 0.25)	0.229 (0.191, 0.286)	0.4	0.2 (0.162, 0.25)
114	0.149 (0.111, 0.206)	0.229 (0.18, 0.312)	0.178 (0.142, 0.238)	0.229 (0.184, 0.3)	0.333	0.2 (0.167, 0.25)
120	0.143 (0.111, 0.207)	0.229 (0.179, 0.312)	0.175 (0.135, 0.243)	0.229 (0.168, 0.286)	0.341	0.2 (0.158, 0.244)
126	0.143 (0.111, 0.189)	0.222 (0.167, 0.286)	0.167 (0.128, 0.226)	0.223 (0.184, 0.286)	0.333	0.201 (0.163, 0.25)
132	0.143 (0.111, 0.197)	0.229 (0.184, 0.3)	0.168 (0.127, 0.23)	0.216 (0.179, 0.258)	0.357	0.2 (0.16, 0.25)
138	0.14 (0.11, 0.2)	0.229 (0.181, 0.3)	0.156 (0.126, 0.232)	0.218 (0.17, 0.262)	0.3	0.2 (0.15, 0.25)
144	0.143 (0.111, 0.194)	0.228 (0.167, 0.282)	0.175 (0.133, 0.238)	0.2 (0.16, 0.25)	0.25	0.2 (0.158, 0.238)
150	0.141 (0.111, 0.189)	0.223 (0.181, 0.286)	0.161 (0.127, 0.21)	0.2 (0.167, 0.25)	0.286	0.2 (0.154, 0.234)
156	0.141 (0.11, 0.189)	0.222 (0.167, 0.267)	0.174 (0.131, 0.222)	0.206 (0.167, 0.25)	0.327	0.2 (0.155, 0.229)
162	0.14 (0.11, 0.188)	0.229 (0.178, 0.29)	0.143 (0.111, 0.184)	0.2 (0.167, 0.25)	0.256	0.2 (0.151, 0.243)
168	0.141 (0.109, 0.188)	0.222 (0.17, 0.286)	0.158 (0.124, 0.232)	0.199 (0.155, 0.244)	0.25	0.184 (0.143, 0.229)
174	0.141 (0.11, 0.184)	0.229 (0.17, 0.287)	0.143 (0.106, 0.193)	0.2 (0.16, 0.25)	0.25	0.2 (0.149, 0.25)
180	0.138 (0.109, 0.188)	0.229 (0.168, 0.299)	0.16 (0.128, 0.217)	0.2 (0.151, 0.229)	0.25	0.197 (0.143, 0.238)
186	0.128 (0.109, 0.184)	0.215 (0.167, 0.259)	0.133 (0.111, 0.199)	0.2 (0.16, 0.234)	0.25	0.183 (0.143, 0.229)
192	0.141 (0.108, 0.177)	0.223 (0.167, 0.293)	0.143 (0.114, 0.19)	0.2 (0.16, 0.229)	0.214	0.184 (0.147, 0.234)
198	0.129 (0.11, 0.193)	0.229 (0.174, 0.3)	0.128 (0.11, 0.167)	0.2 (0.143, 0.25)	0.2	0.2 (0.143, 0.234)
204	0.139 (0.104, 0.175)	0.229 (0.167, 0.293)	0.13 (0.11, 0.187)	0.2 (0.143, 0.234)	0.202	0.182 (0.143, 0.229)
210	0.128 (0.11, 0.177)	0.229 (0.167, 0.28)	0.139 (0.111, 0.19)	0.2 (0.148, 0.229)	0.229	0.17 (0.143, 0.224)
216	0.14 (0.106, 0.199)	0.222 (0.167, 0.285)	0.128 (0.0965, 0.167)	0.2 (0.163, 0.25)	0.286	0.167 (0.143, 0.234)
222	0.128 (0.104, 0.177)	0.218 (0.167, 0.284)	0.128 (0.0969, 0.163)	0.2 (0.155, 0.236)	0.228	0.2 (0.143, 0.229)
228	0.128 (0.1, 0.172)	0.229 (0.167, 0.32)	0.128 (0.099, 0.167)	0.2 (0.143, 0.238)	0.229	0.167 (0.142, 0.223)
234	0.128 (0.11, 0.186)	0.229 (0.167, 0.311)	0.125 (0.0977, 0.176)	0.186 (0.143, 0.229)	0.216	0.173 (0.143, 0.226)
240	0.128 (0.105, 0.199)	0.213 (0.166, 0.267)	0.128 (0.0857, 0.177)	0.185 (0.143, 0.244)	0.223	0.174 (0.143, 0.229)
246	0.128 (0.102, 0.177)	0.213 (0.158, 0.286)	0.12 (0.0933, 0.143)	0.2 (0.146, 0.23)	0.229	0.185 (0.143, 0.229)
252	0.128 (0.104, 0.197)	0.214 (0.163, 0.267)	0.127 (0.1, 0.188)	0.2 (0.144, 0.248)	0.229	0.165 (0.128, 0.22)
258	0.127 (0.101, 0.167)	0.214 (0.154, 0.286)	0.118 (0.0924, 0.162)	0.2 (0.143, 0.238)	0.229	0.167 (0.141, 0.229)
264	0.128 (0.0983, 0.177)	0.2 (0.154, 0.253)	0.108 (0.0845, 0.141)	0.2 (0.143, 0.25)	0.229	0.167 (0.143, 0.223)
270	0.139 (0.111, 0.195)	0.218 (0.167, 0.258)	0.111 (0.0787, 0.147)	0.198 (0.143, 0.233)	0.2	0.18 (0.143, 0.228)
276	0.128 (0.109, 0.17)	0.229 (0.163, 0.3)	0.128 (0.101, 0.194)	0.2 (0.152, 0.25)	0.198	0.16 (0.127, 0.223)
282	0.128 (0.111, 0.177)	0.204 (0.143, 0.286)	0.127 (0.0958, 0.167)	0.2 (0.143, 0.25)	0.175	0.167 (0.128, 0.223)
288	0.128 (0.1, 0.16)	0.2 (0.144, 0.25)	0.111 (0.0862, 0.145)	0.184 (0.143, 0.229)	0.22	0.167 (0.127, 0.22)
294	0.128 (0.107, 0.171)	0.222 (0.16, 0.299)	0.113 (0.0816, 0.166)	0.2 (0.143, 0.25)	0.2	0.166 (0.127, 0.221)
300	0.134 (0.1, 0.178)	0.211 (0.143, 0.271)	0.113 (0.0685, 0.158)	0.184 (0.143, 0.25)	0.168	0.162 (0.127, 0.218)
